# Supplementary material
Source: MDPI journal article supplement (https://www.mdpi.com/2312-7481/10/5/32)
Supplement: s1 [file s1]

## Supplementary Materials

# Relationship between Structure and Zero-Field Splitting of Octahedral Nickel(II) Complexes with a Low-Symmetric Tetradentate Ligand

Hiroshi Sakiyama <sup>1,\*</sup>, Rin Kimura <sup>1</sup>, Haruto Oomiya <sup>1</sup>, Ryoji Mitsunashi <sup>2</sup>, Sho Fujii <sup>1</sup>, Katsuhiko Kanaizuka <sup>1</sup>, Mohd. Muddassir <sup>3</sup>, Yuga Tamaki <sup>4</sup>, Eiji Asato <sup>4</sup> and Makoto Handa <sup>5</sup>

<sup>1</sup> Department of Science, Faculty of Science, Yamagata University, Kojirakawa, Yamagata 990-8560, Japan; s201161@st.yamagata-u.ac.jp (R.K.); s211401@st.yamagata-u.ac.jp (H.O.); sfujii@sci.kj.yamagata-u.ac.jp (S.F.); kanaizuka@sci.kj.yamagata-u.ac.jp (K.K.)

<sup>2</sup> Institute of Liberal Arts and Science, Kanazawa University, Kakuma, Kanazawa 920-1192, Japan; mitsunashi@staff.kanazawa-u.ac.jp

<sup>3</sup> Department of Chemistry, College of Science, King Saud University, Riyadh 11451, Saudi Arabia; muddassir@ksu.edu.sa

<sup>4</sup> Department of Chemistry, Biology and Marine Science, Faculty of Science, University of the Ryukyus, Nishihara, Nakagami-gun, Okinawa 903-0213, Japan; k238376@eve.u-ryukyu.ac.jp (Y.T.); asato@sci.u-ryukyu.ac.jp (E.A.)

<sup>5</sup> Graduate School of Natural Science and Technology, Shimane University, 1060 Nishikawatsu, Matsue 690-8504, Japan; handam@riko.shimane-u.ac.jp

\* Correspondence: saki@sci.kj.yamagata-u.ac.jp

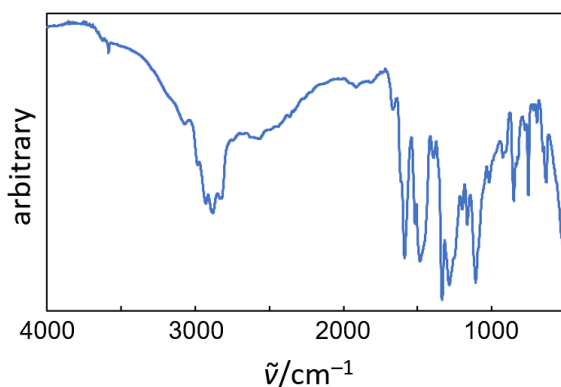

Figure S1. IR spectra of onp<sup>-</sup> ligand.

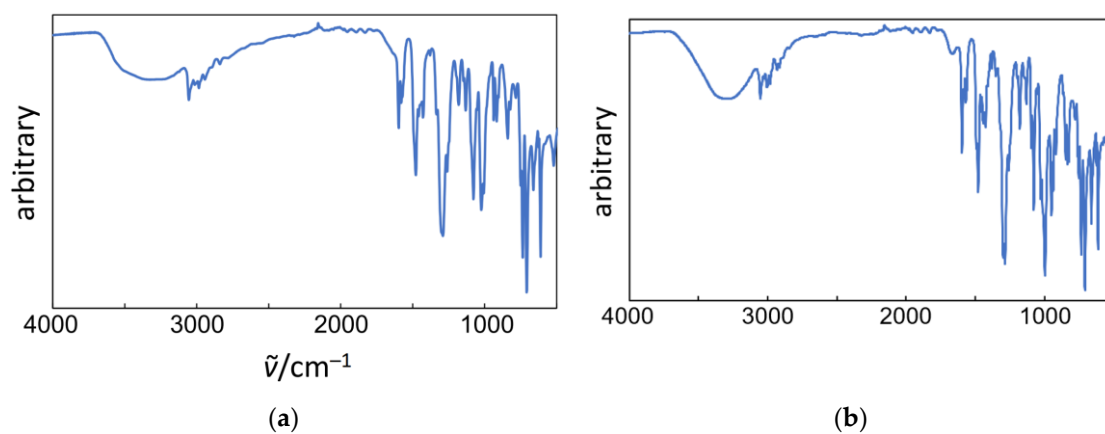

**Figure S2.** IR spectra of the crude product and **1**: (a) the crude product; (b)  $[\text{Ni}(\text{onp})(\text{dmsO})(\text{H}_2\text{O})][\text{BPh}_4] \cdot 2\text{dmsO}$  (**1**).

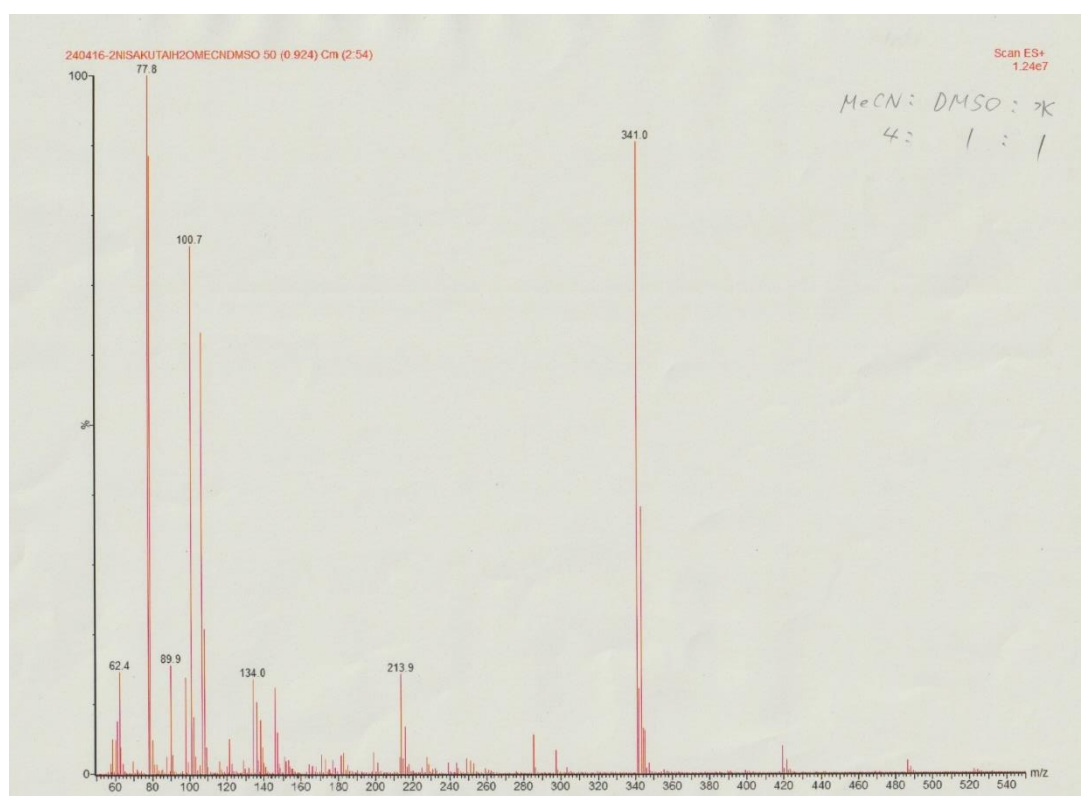

**Figure S3.** ESI mass spectra of **1** in mixed solvents (acetonitrile: dimethyl sulfoxide:  $\text{H}_2\text{O}$  = 4: 1: 1).

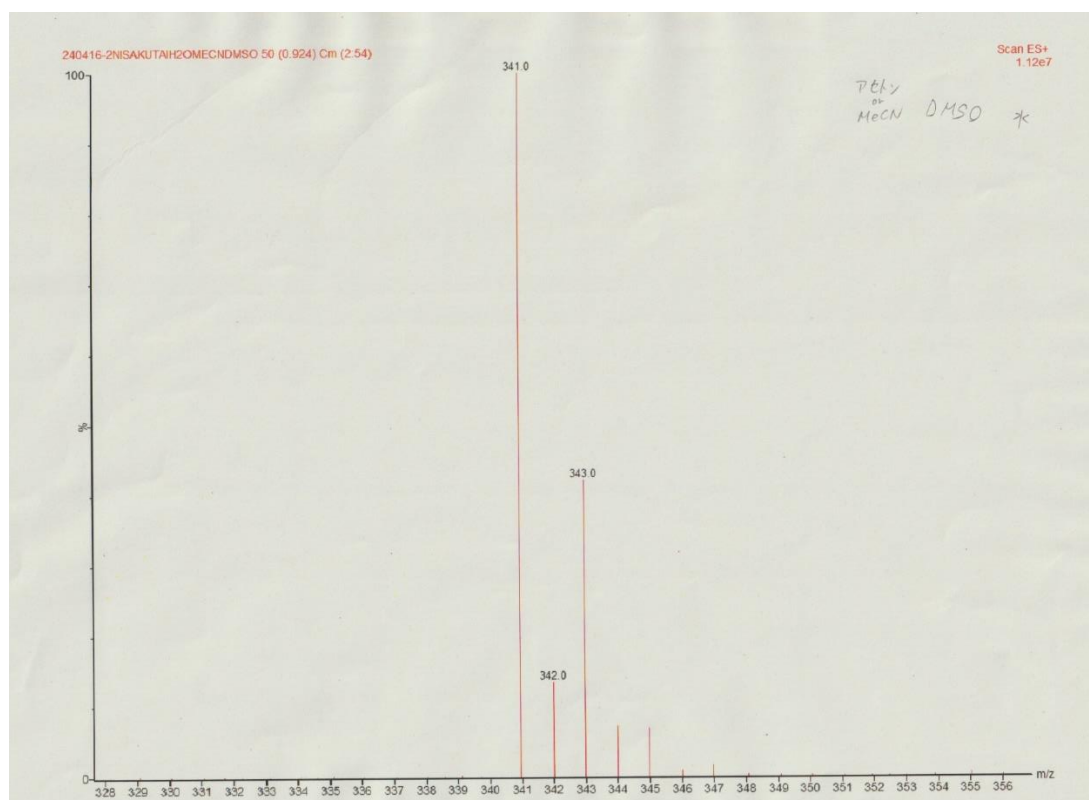

**Figure S4.** ESI mass spectra of **1** in mixed solvents (acetonitrile: dimethyl sulfoxide: H<sub>2</sub>O = 4: 1: 1) at around  $m/z = 341$ .

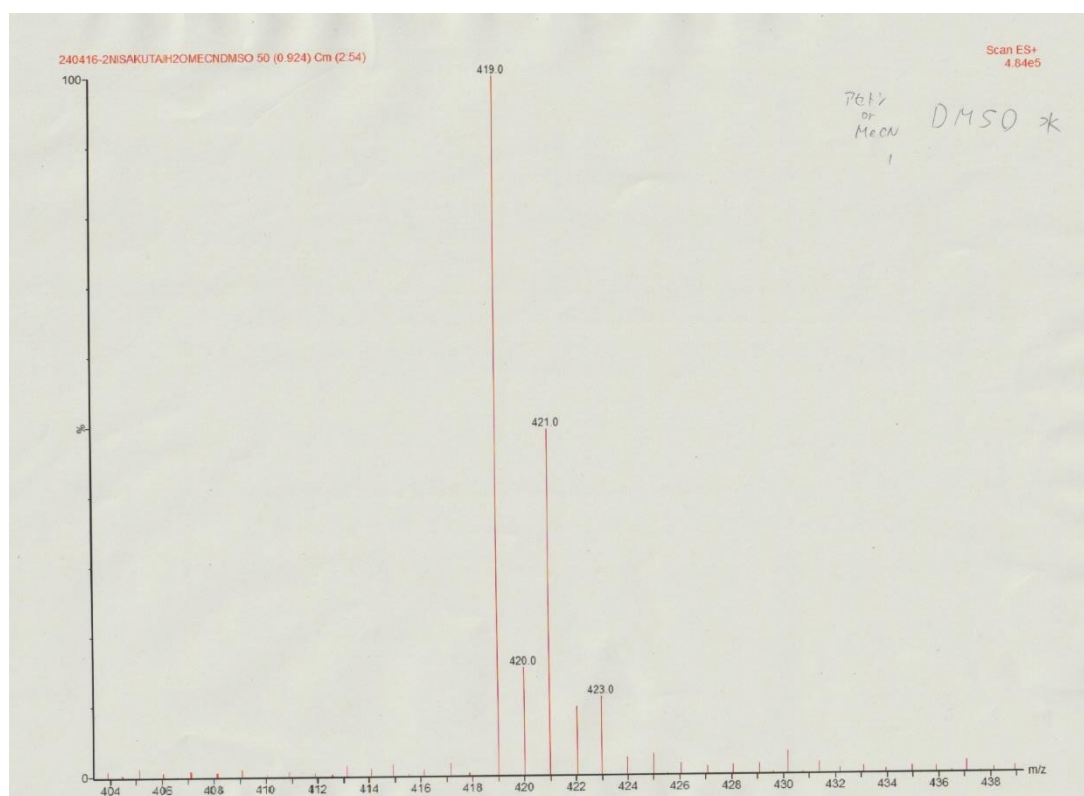

**Figure S5.** ESI mass spectra of **1** in mixed solvents (acetonitrile: dimethyl sulfoxide: H<sub>2</sub>O = 4: 1: 1) at around  $m/z$  = 419.
